# Supplementary material for: A multifunctional colorimetric sensor originating from a cadmium naphthalene diimide-based metal–organic framework: photochromism, hydrochromism, and vapochromism
Source: Royal Society of Chemistry journal article supplement (doi:10.1039/d1ce00352f), 2021-01-01
Supplement: d1ce00352f1.pdf [file d1ce00352f1.pdf]

## Supplementary Information

### **A multifunctional colorimetric sensors originated from a cadmium naphthalene diimide-based metal-organic framework: photochromism, hydrochromism and vapochromism**

Guoshuai Zhang,<sup>a</sup> Chen Fu,<sup>a</sup> Heyi Zhang,<sup>a</sup> Hong Zhang,<sup>a,\*</sup>

<sup>a</sup> Key Lab of Polyoxometalate Science of Ministry of Education, Faculty of Chemistry, Northeast Normal University, Changchun 130024, China.

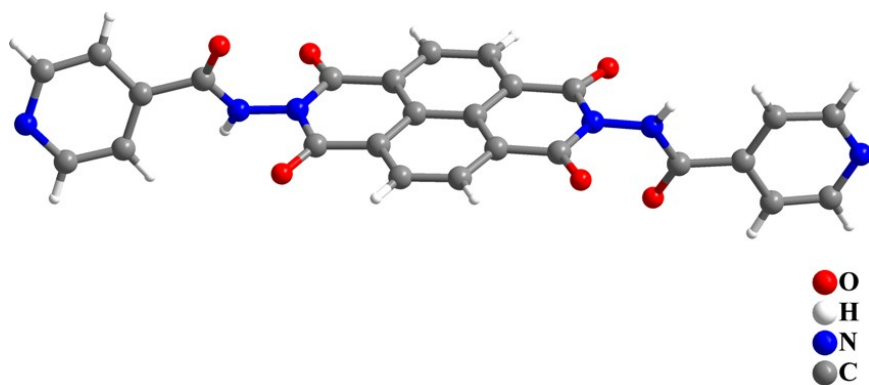

Fig. S1. The structure of N,N'-di(4-pyridylacetyl)amino-1,4,5,8-naphthalenediimide (IsoNDI)

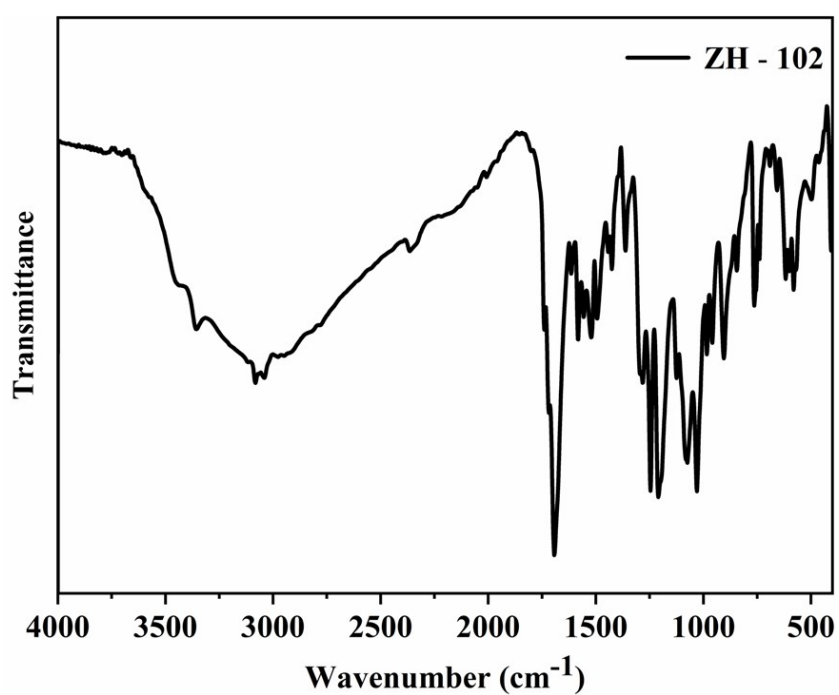

Fig. S2. FT-IR spectra of compound ZH-102.

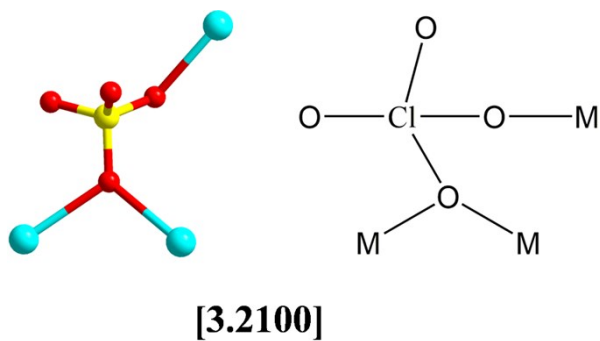

Fig. S3. The Harris notation of the ZH-102.

**Table S1.** The selected bond lengths [ $\text{\AA}$ ] and angles [ $^\circ$ ] of complex **ZH-102**.

|                      |            |                       |            |
|----------------------|------------|-----------------------|------------|
| Cd(1)-O(8)           | 2.258(2)   | Cd(1)-N(4)#2          | 2.356(2)   |
| Cd(1)-N(3)           | 2.304(2)   | Cd(1)-O(7)            | 2.357(2)   |
| Cd(1)-O(11)#1        | 2.3072(18) | Cd(1)-O(11)#3         | 2.3811(18) |
| O(8)-Cd(1)-N(3)      | 107.96(8)  | N(3)-Cd(1)-O(7)       | 86.07(8)   |
| O(8)-Cd(1)-O(11)#1   | 95.82(7)   | O(11)#1-Cd(1)-O(7)    | 176.62(7)  |
| N(3)-Cd(1)-O(11)#1   | 92.18(7)   | N(4)#2-Cd(1)-O(7)     | 83.89(8)   |
| O(8)-Cd(1)-N(4)#2    | 83.50(8)   | O(8)-Cd(1)-O(11)#3    | 163.70(7)  |
| N(3)-Cd(1)-N(4)#2    | 164.42(8)  | N(3)-Cd(1)-O(11)#3    | 85.03(7)   |
| O(11)#1-Cd(1)-N(4)#2 | 97.21(8)   | O(11)#1-Cd(1)-O(11)#3 | 73.37(7)   |
| O(8)-Cd(1)-O(7)      | 87.48(8)   | N(4)#2-Cd(1)-O(11)#3  | 85.79(7)   |
| O(7)-Cd(1)-O(11)#3   | 103.57(7)  |                       |            |

Symmetry transformations used to generate equivalent atoms: #1  $-x,-y,-z+2$ , #2  $x-1,y-1,z+1$ , #3  $x+1,y,z$ , #4  $x-1,y,z$ , #5  $x+1,y+1,z-1$ .

| Band        | Distance | $r_o$ | Value |
|-------------|----------|-------|-------|
| CD1 – O7    | 2.360(3) | 1.904 | 0.291 |
| CD1 – O8    | 2.254(3) | 1.904 | 0.388 |
| CD1 – O11#1 | 2.306(2) | 1.904 | 0.337 |
| CD1 – O11#3 | 2.379(2) | 1.904 | 0.277 |
| CD1 – N3    | 2.301(3) | 1.960 | 0.398 |
| CD1 – N4#2  | 2.352(3) | 1.960 | 0.347 |
| Valence     |          |       | 2.038 |

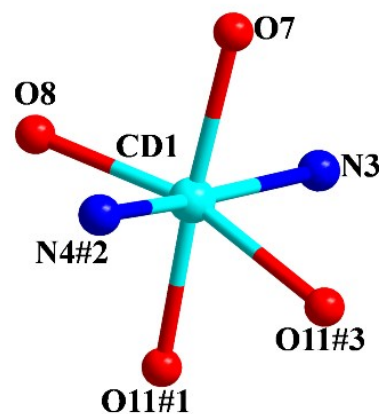**Fig. S4.** BVS and coordination mode for the site Cd1 in the **ZH-102**.

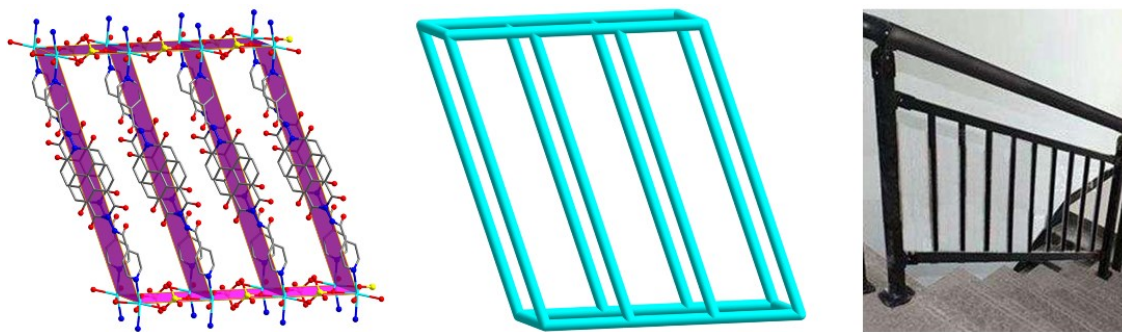

Fig. S5. A structure similar to a 'safety fence' of the ZH-102.

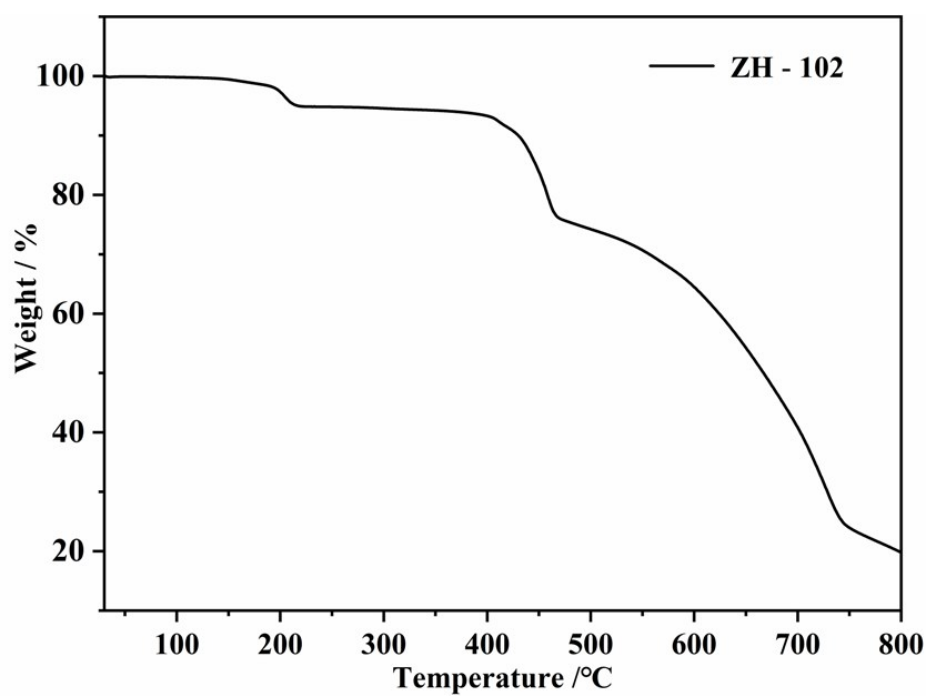

Fig. S6. TG curves for compound ZH-102.

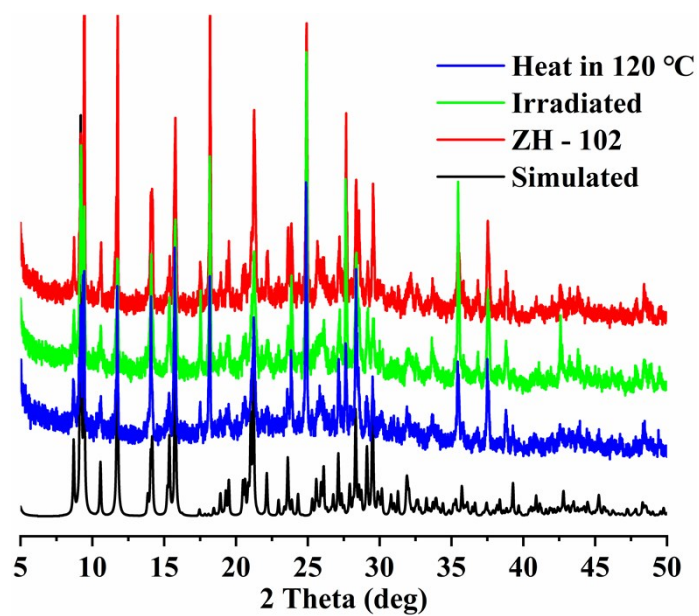

**Fig. S7.** PXRD patterns of the **ZH-102**; the simulated, as-synthesized (**ZH-102**), the irradiated crystals and the irradiated crystals after heated 120 °C.

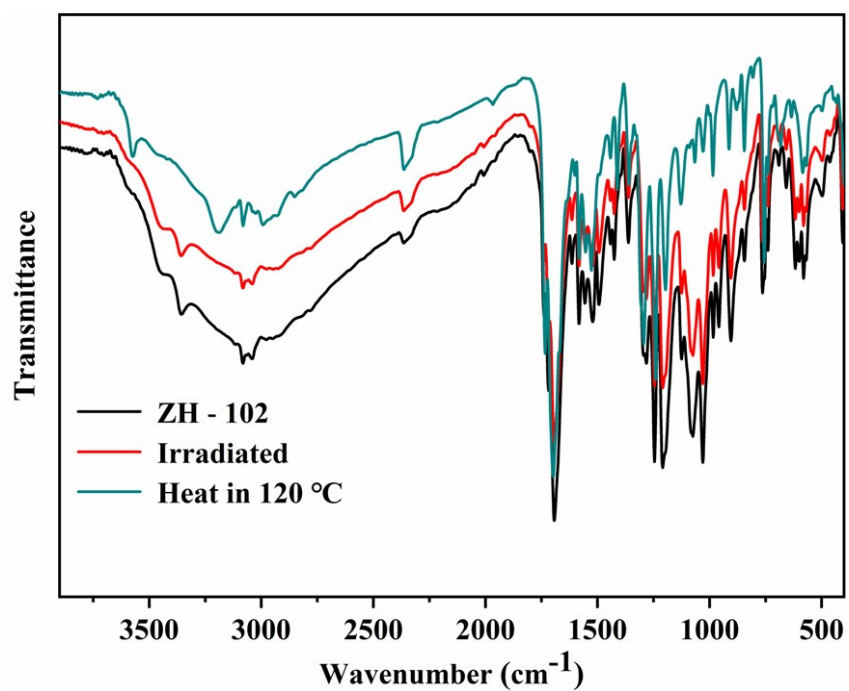

**Fig. S8.** IR spectra of the **ZH-102**; as-synthesized (**ZH-102**), the irradiated crystals and the irradiated crystals after heated 120 °C.

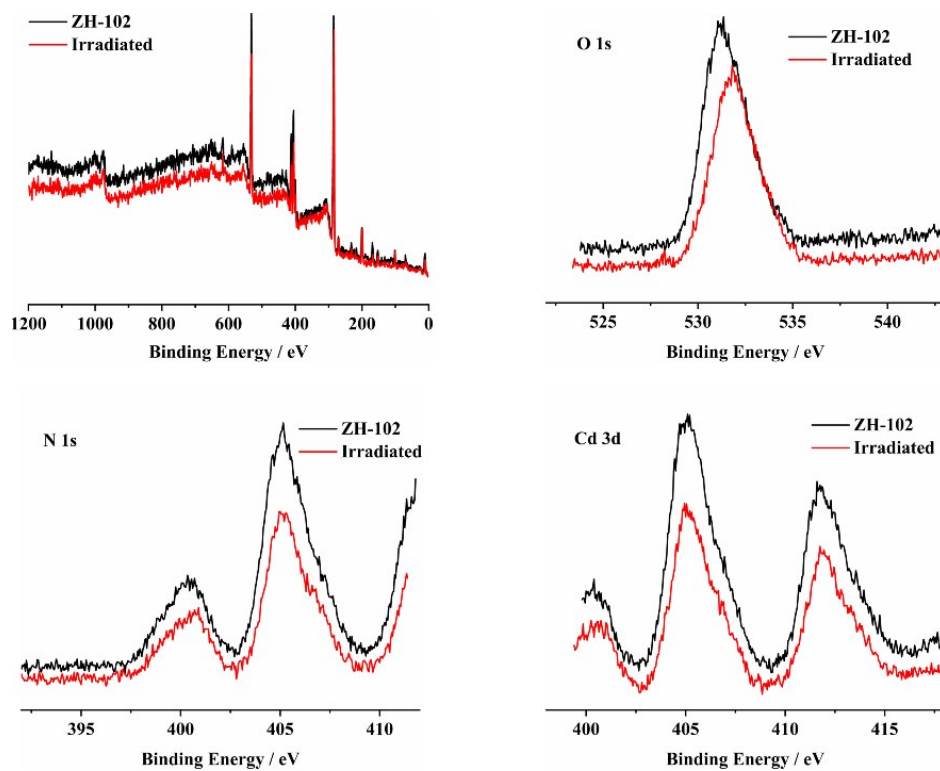

**Fig. S9.** XPS (Al-K $\alpha$ ) core-level spectra of the **ZH-102** before and after irradiated.

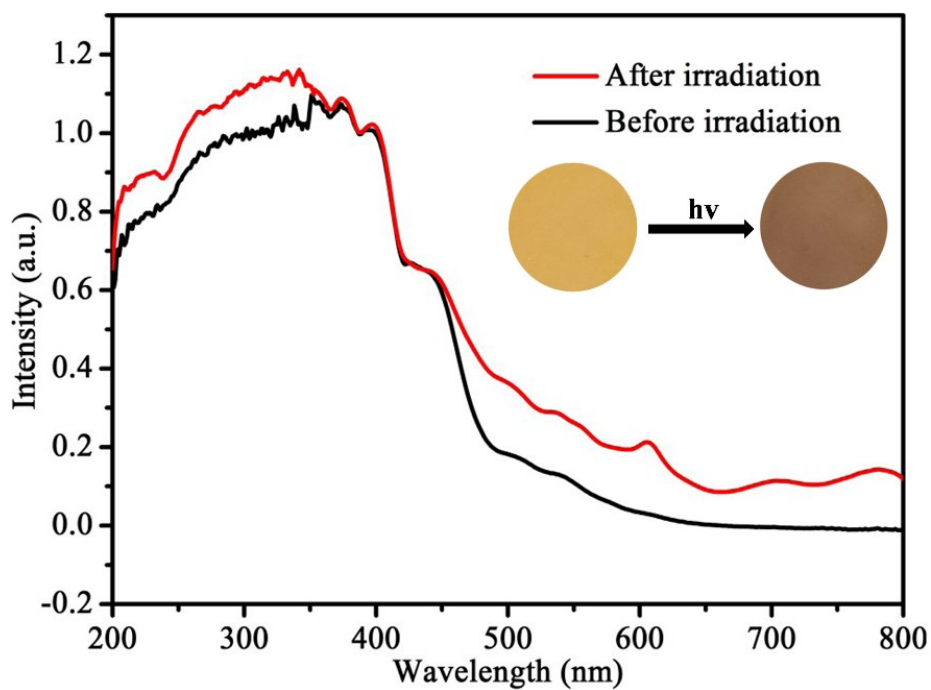

**Fig. S10.** The UV-Vis spectrum and photographic images of IsoNDI ligand in the photochromic process.

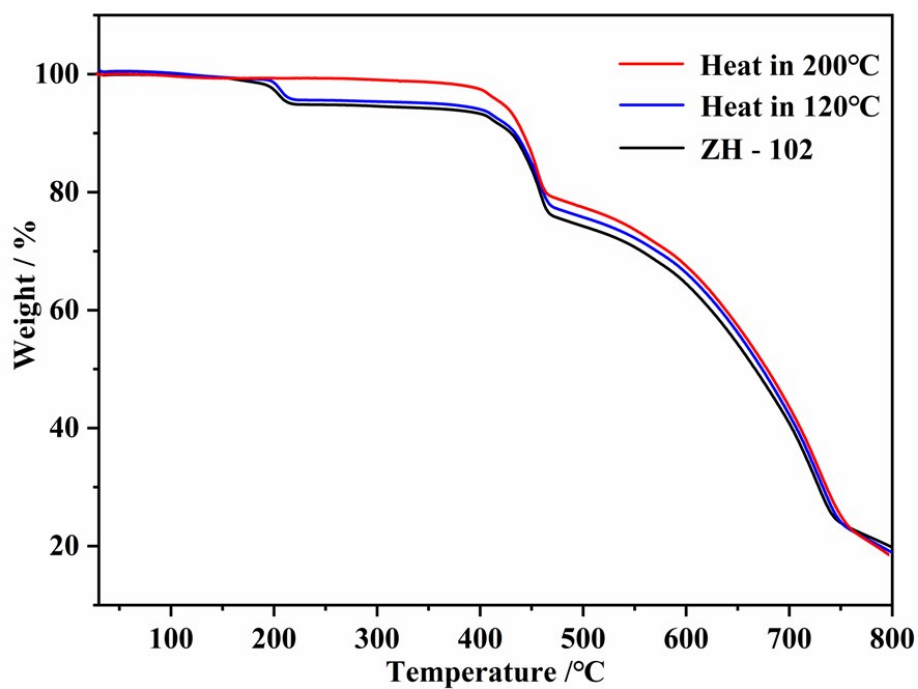

**Fig. S11.** TG curves of the **ZH-102**, as-synthesized (**ZH-102**), the heated crystals (120 °C) and the heated crystals (200 °C).

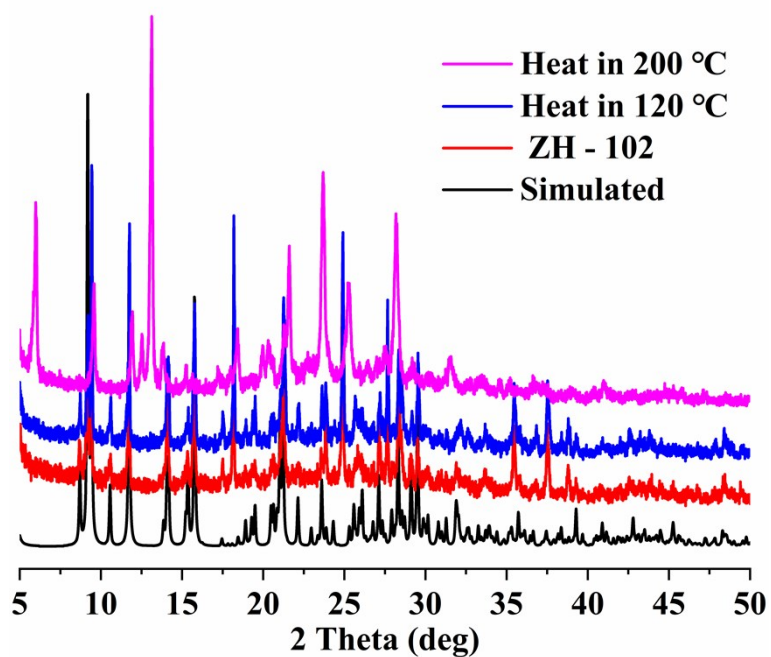

**Fig. S12.** PXRD patterns of the **ZH-102**; as-synthesized (**ZH-102**), the heated crystals (120 °C) and the heated crystals (200 °C).

**Table S2.** Crystal parameters of complex **ZH-102** after optimization of the structure (VASP) and heating (200 °C).

|                 | After optimization | After heating (200 °C) |
|-----------------|--------------------|------------------------|
| Cryst. Syst     | Triclinic          | Triclinic              |
| Space group     | <i>P-1</i>         | <i>P-1</i>             |
| a (Å)           | 6.65               | 6.56                   |
| b (Å)           | 10.78              | 10.71                  |
| c (Å)           | 19.21              | 19.01                  |
| $\alpha$ (°)    | 96.43              | 96.37                  |
| $\beta$ (°)     | 98.29              | 98.67                  |
| $\gamma$ (°)    | 107.41             | 107.57                 |
| $V(\text{Å}^3)$ | 1285.5             | 1241                   |



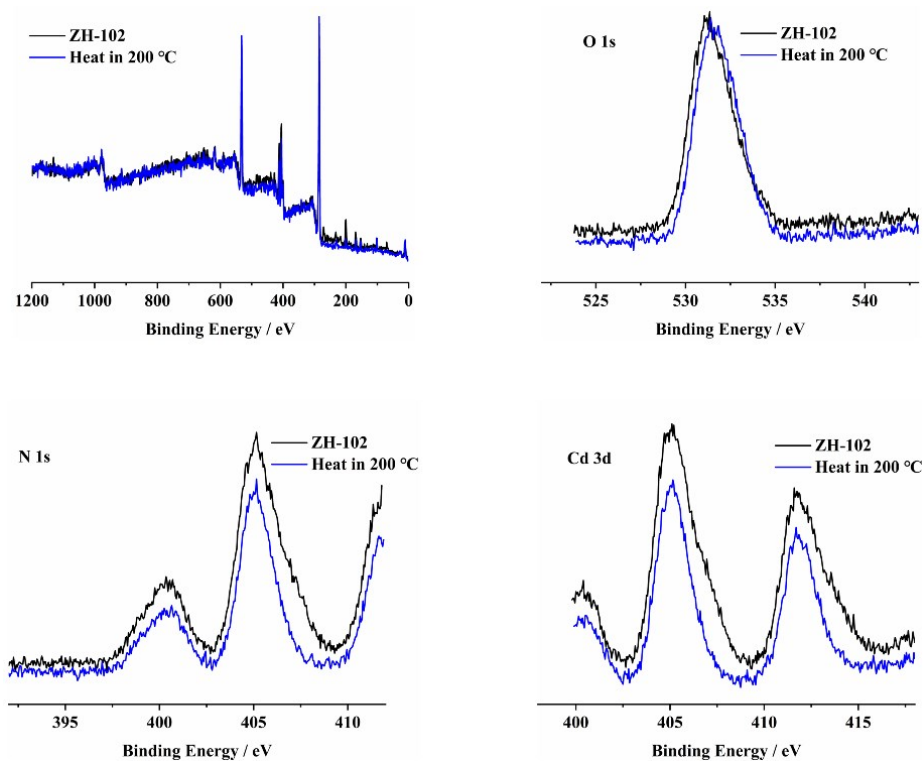

Fig. S13. XPS (Al-K $\alpha$ ) core-level spectra of the **ZH-102** before and after heat in 200 °C.

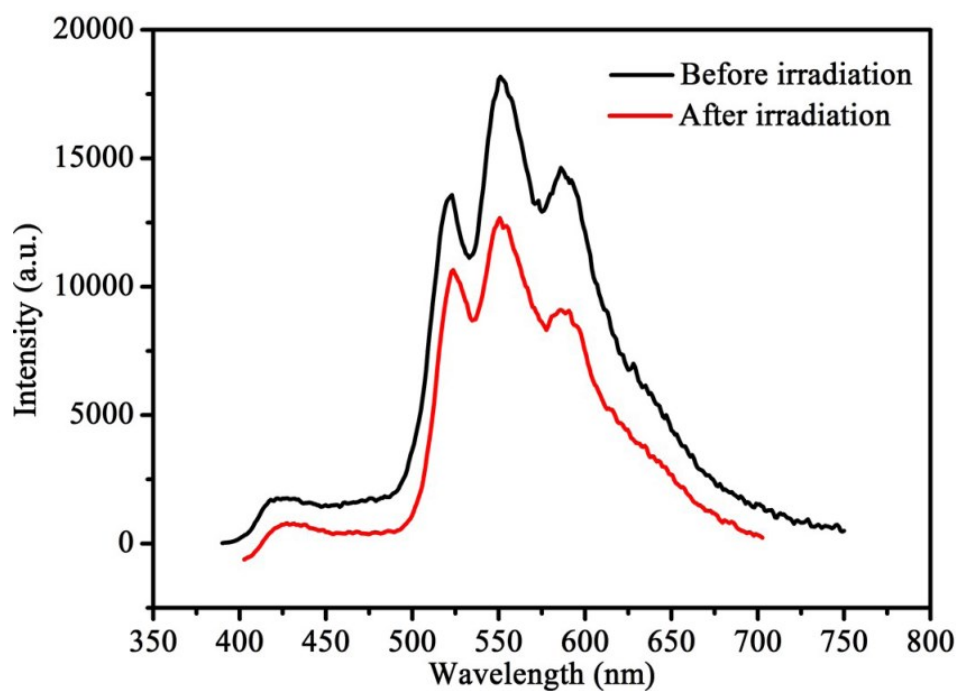

Fig. S14. Photo-controlled luminescence spectrum of IsoNDI ligand.

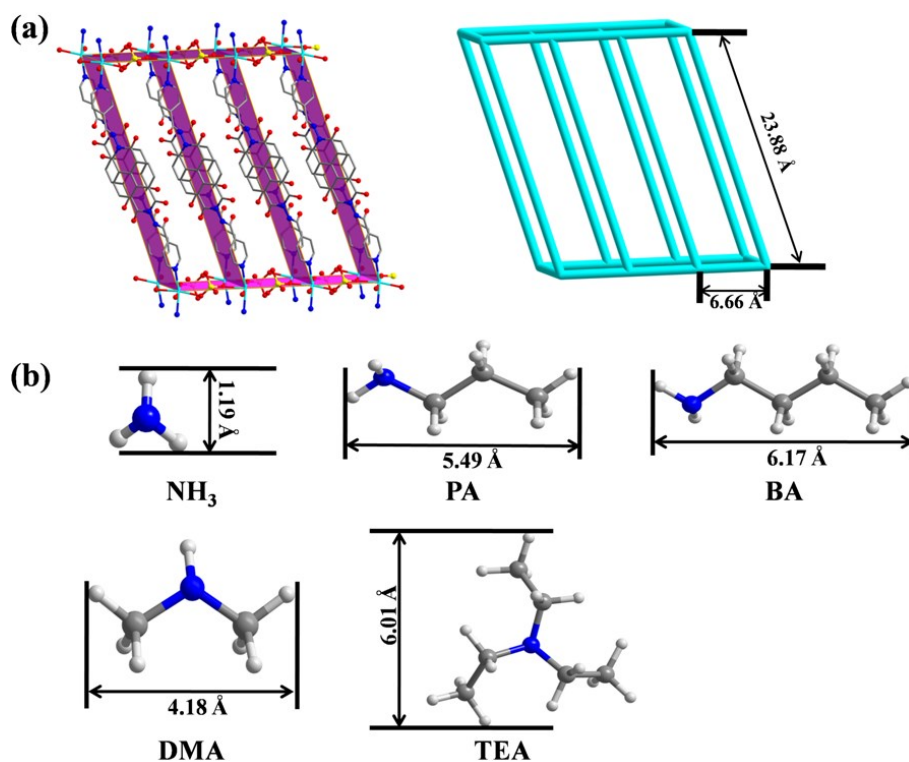

**Fig. S15.** The rhombic-shaped window-like size of the **ZH-102** and the longest dimension of these five different amines (PA = n-propylamine, BA = n-butylamine, DMA = dimethylamine, TEA = triethylamine).

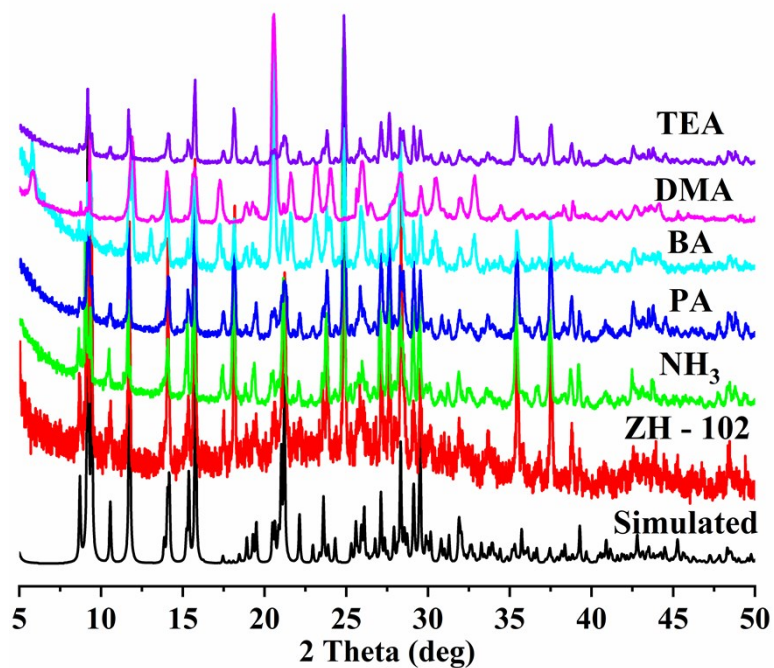

**Fig. S16.** PXRD patterns of the **ZH-102** and the **ZH-102** after soaking in various amines (PA = n-propylamine, BA = n-butylamine, DMA = dimethylamine, TEA = triethylamine).

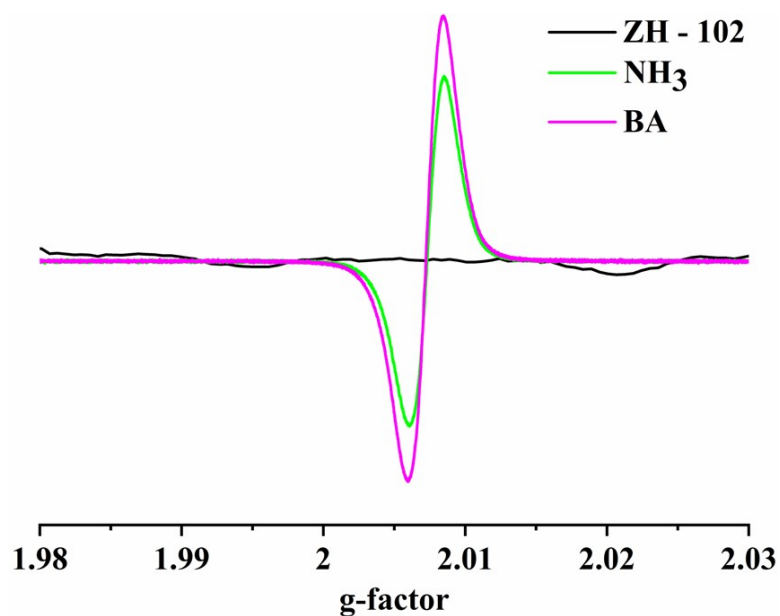

**Fig. S17.** ESR spectra of the sample of the **ZH-102** before irradiation (black line, **ZH-102**), after the **ZH-102** was exposed to  $\text{NH}_3$  and BA.

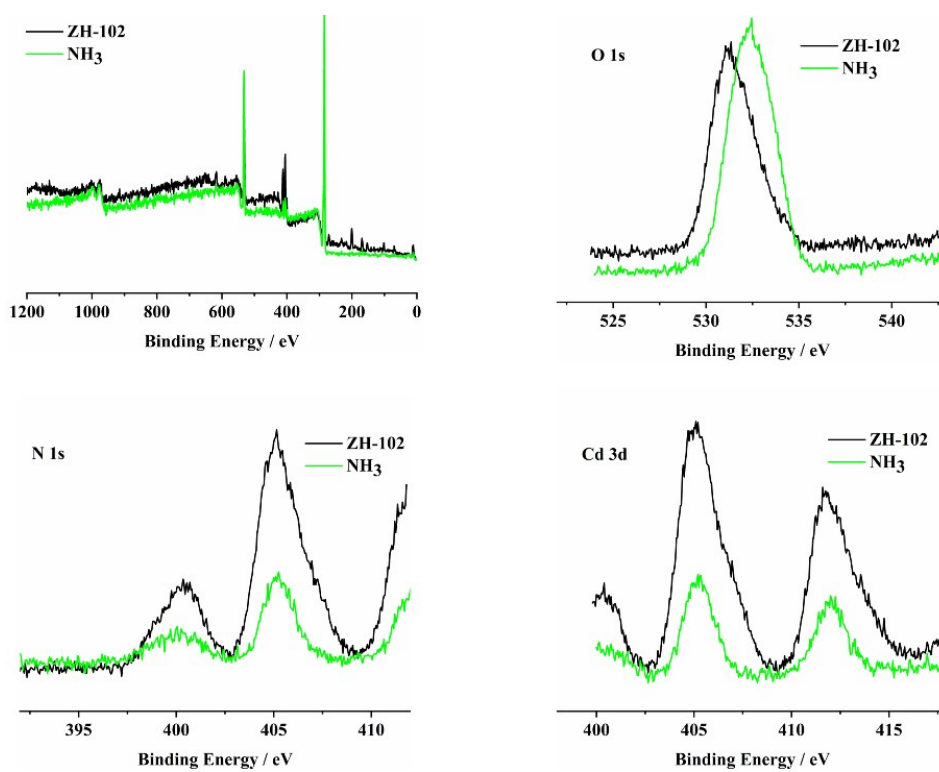

**Fig. S18.** XPS ( $\text{Al-K}\alpha$ ) core-level spectra of the **ZH-102** and the **ZH-102** was exposed to  $\text{NH}_3$  vapors.

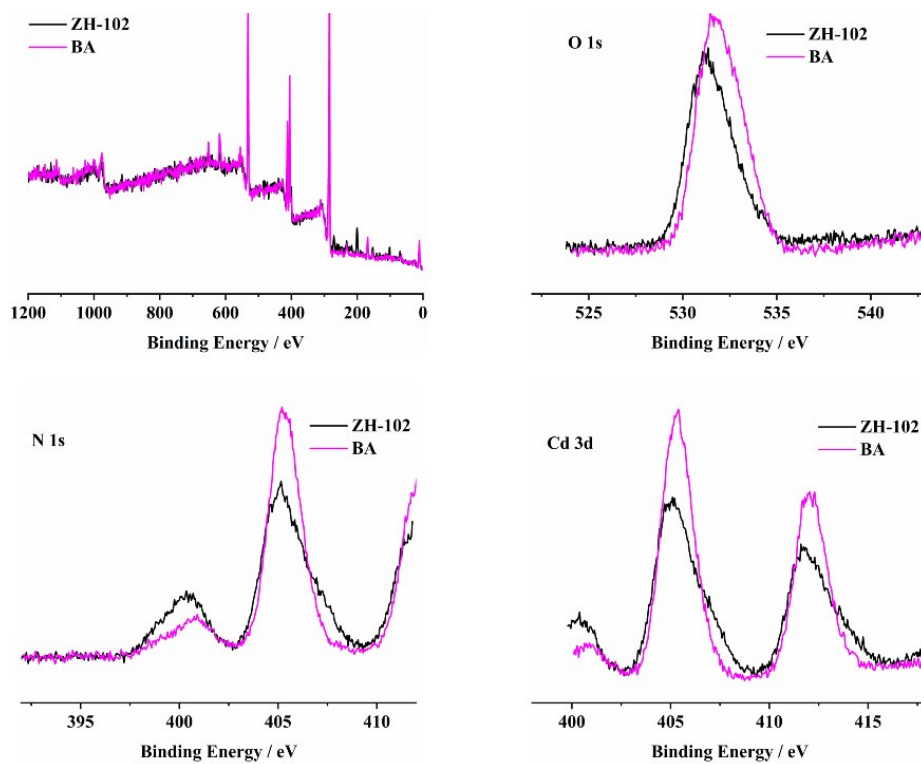

**Fig. S19.** XPS (Al-K $\alpha$ ) core-level spectra of the **ZH-102** and the **ZH-102** was exposed to n-butylamine (BA) vapors.
